# Supplementary material for: Periodic dynamic induction control of wind farms: proving the potential in simulations and wind tunnel experiments
Source: Copernicus journal article supplement (doi:10.5194/wes-2019-50), 2019-08-09
Supplement: Supplementary file [file wes-2019-50-AC1-supplement.pdf]

Date October 18, 2019  
Our reference WES-2019-50  
Contact person J.A. Frederik  
Telephone/fax +31 (0)15 27 85623 / n/a  
E-mail J.A.Frederik@TUDelft.nl  
Subject Author's response

**Delft University of Technology**

---

Delft Center for Systems and Control

Address  
Mekelweg 2 (3ME building)  
2628 CD Delft  
The Netherlands

[www.dcsc.tudelft.nl](http://www.dcsc.tudelft.nl)

Referees  
*Wind Energy Science Discussion*

Dear Reviewers,

First of all, the authors would like to thank the reviewers for their positive and constructive feedback. We believe that the comments have helped us to further improve the quality of the paper. In our attempt to account for the comments, we have revised different aspects of the paper. The objective of this document is to respond to the points raised by the reviewers and to provide a detailed overview of the changes made to the paper. In the subsequent sections, we will respond to the review report provided by each of the reviewers.

Yours sincerely,

Joeri Frederik

Enclosure(s): Response to comments of Anonymous Referee #1  
Response to comments of Johan Meyers  
Response to comments of Anonymous Referee #3  
Response to comments of Anonymous Referee #4

## Response to comments of Anonymous Referee #1

- The paper is well presented and well argued, and adds valuable contributions to the literature, including a first analysis of loads in dynamic induction control as well as a wind tunnel study validating the approach. The figures and descriptions are good, and the paper is very direct to understand.

The authors would like to thank the referee for the positive feedback.

- Mostly minor comments follow below. Main over-arching comment is really a question to propose be considered in the next version of the paper. Fig 9 shows very small effect on turbine 3. Is this to be expected? In completing this review, I re-read "Towards practical dynamic induction control of wind farms: analysis of optimally controlled windfarm boundary layers and sinusoidal induction control of first-row turbines and found this passage: Figure 8 illustrates that the first-row optimized thrust coefficient also results in a significant power increase in the third row, which is not observed using the sinusoidal thrust strategy. Furthermore, the analysis of the modified control cases in Fig. 11 proves that the first-row controls are also partially synchronized with the flow. This shows that other mechanisms, dependent on specific flow events for increasing windfarm power, are at play as well. Even though the application of regression algorithms in an attempt to link turbine actions to low-dimensional flow measurements (e.g., local velocity, shear and kinetic energy) has been unsuccessful thus far, similar analysis based upon more complex flow features (e.g., vorticity structures, high-speed turbulent streaks, or downdrafts) might be more promising. This requires further optimal control simulations over an extended time, as the total control time horizon of 30 min in the current dataset is insufficient for robust statistics in this kind of analysis. This is an important remaining challenge to be addressed in future research. As well as this from the conclusion of the same paper: Although the first-row sinusoidal control led to a robust increase in total power for a reduced-size 44 wind farm, a full-scale test indicated that downstream turbine activity is required to obtain increased power at larger farm scales. It was also shown that the simple sinusoidal strategy does not lead to increased power extraction when applied to downstream intermediate turbines. Identifying the mechanisms for power increase in these turbines hence remains an important open research question. My reading is that yes, these results do confirm this, the third turbine is not expected to increase in power unless (if I understand correctly) 1. The first turbine pursues a non-sinusoidal DIC or 2. The second turbine performs DIC additionally Do you agree? Are there plans to try any DIC on the second turbine etc?

Figures 9-11 in the paper show that, in the wind tunnel, turbine 3 does in fact have a slightly increased power production when periodic DIC is applied on turbine 1. This gain is very small - much smaller than the gain obtained at turbine 2 - but as Figure 10 shows, it is in fact significant. Therefore, the claim that *no* power increase at turbine 3 is expected with periodic DIC is therefore not supported by the data presented in this paper. However, to address this point more specifically in the paper, both in the analysis in Section 6.1 and in the Conclusions, it will be stressed that the majority of the gain in power production is obtained at turbine 2. With regards to periodic DIC on the second turbine: we have in fact executed wind tunnel experiments with periodic DIC on both the first and the second turbine. However, the results of these experiments are as of yet inconclusive, which is why they are not included in this paper. Future research in this topic would definitely be of interest to us, although there are no direct plans for this. For completeness, this research direction is added to the future research opportunities in Section 7.

- Small Comments: Fig 1 could use a more descriptive labeling/caption, its not clear what each of the lines represent

A more descriptive caption is added to Figure 1 to explain more elaborately what is shown in this figure: *A schematic representation of a wind turbine in flow field, showing the working principles of static (a) and dynamic induction control (b). On the top, the turbine is simplified as a rotor disk, and its streamtube - the area where the wind speed is affected by the turbine settings - is depicted. The force  $F_T$  exerted on the wind is shown for different induction settings, where red depicts greedy control, orange and yellow arbitrary static derating settings, and green periodic DIC. The bottom figures show the corresponding wind velocity profiles, with respect to inflow velocity  $U_\infty$ , as a function of the distance from the turbine. The area highlighted in blue is where a downstream turbine is typically located.*

- DTU 5 MW turbine (Jonkman et al., 2009), shouldnt that be NREL? 5MW (based on reference provided)

The referee is absolutely right. This erratum has been corrected as suggested.

- Table 1, for experiments the control input is Beta, but amplitude is specified in Ct? (Now I see this is explained later in the text, but might be good to ensure the explanation is indicated in the table or indicate to the reader explanation is coming?)

To clarify the effect of  $\beta$  on  $C'_T$ , the following sentence is added in the caption of Table 1: *Note that the pitch amplitude  $\beta = 2^\circ$  used in the simulations leads to a amplitude of approximately  $C'_T = 1.5$ .*

- Figure 6: This is a really useful view into the loading impacts Is there a reference for Weibull-weighted DELs? A nice idea, are they used often?

XXX

- Fig 7-8, why do the effects persist above 15 m/s? I believe this addressed in text, but could be useful to re-iterate in caption, maybe also indicate with a vertical line where the DIC would be actually shut off?

As mentioned in the text, "The DIC was assumed to be activated for wind speeds between 3 and 25 m/s, to cover the totality of regions I-1/2, II, II-1/2 and III", which "is to be regarded as a conservative choice". When DIC is only applied in region II, the loads will of course be identical to the baseline case above rated wind speeds. To further emphasize this, a vertical line is included to indicate the rated wind speed, with the caption describing that "Typically, DIC will only be implemented at below-rated inflow velocities."

- Fig 8: seems to have an error in caption

There is indeed an error in the caption, which has been removed.

- Section 6.2 Do you use the FLORIS model of Gebraad 2016, or the newer gaussian model of Bastankah within FLORIS? Maybe provide FLORIS version number?

The FLORIS model with gaussian distribution as proposed by Bastankah was used. For clarity, the reference was changed to represent the version that was used in this paper.

## Response to comments of Johan Meyers

- Very interesting work, which I strongly recommend for publication. I have a number of smaller comments, that should be relatively easy to incorporate in a revision.

The authors would like to thank prof. Meyers for the kind words, and hope to address all the smaller comments to his satisfaction.

- 1. abstract: In this paper, only periodic variation,  $\lambda$  variations

This erratum has been corrected as suggested.

- 2. Figure 1: please improve. In 1a (bottom) for clarity, please indicate levels of  $C_T$  associated with different velocity profiles. In 1b, not clear what the order is of the velocity profiles (in time or phase of the sinusoidal forcing). Also not 100% convinced that this will be the effective response is this an artists impression, or is this based on some model? Please clarify in the fig caption and text.

To answer the final question posed by the referee: this figure is not based on some model or measurement, but rather a schematic representation of the flow through a rotor streamtube, meant only to clarify the working principle of DIC with respect to static induction control. As such, the lines do not represent specific values of  $C_T$  or  $U_\infty$ . To emphasize this, a more elaborate caption has been added to this figure: *A schematic representation of a wind turbine in flow field, showing the working principles of static (a) and dynamic induction control (b). On the top, the turbine is simplified as a rotor disk, and its streamtube - the area where the wind speed is affected by the turbine settings - is depicted. The force  $F_T$  exerted on the wind is shown for different induction settings, where red depicts greedy control, orange and yellow arbitrary static derating settings, and green periodic DIC. The bottom figures show the corresponding wind velocity profiles, with respect to inflow velocity  $U_\infty$ , as a function of the distance from the turbine. The area highlighted in blue is where a downstream turbine is typically located.*

- 3. In the paper, it is suggested a couple of times that CFD is performed: - Page 2: Simulations will be executed using the high-fidelity Computational Fluid Dynamics (CFD) environment SOWFA - Page 7: Once the optimal DIC parameters in terms of wake mixing have been evaluated using CFD, ... However, apart from these, CFD seems not to be really discussed... Please clarify. If you use CFD in some way, it would merit a much lengthier description (computational domain, mesh, boundary conditions, models used, some results, ...)

The CFD simulations mentioned here were removed from the paper in one of the final stages before submission. The most important reason for this was that the authors felt like the contribution of this CFD study to the already existing literature (mostly by Munters and Meyers) was limited. We therefore chose to focus on the most important scientific contributions: the load analysis and the wind tunnel experiments. All references to CFD simulations have been removed in the updated version of the manuscript.

- 4. Figure 2: how was this figure constructed (please make caption more self-contained). Did you use the procedure described on top of page 4? Or did you use BEM, or the Cp-Lambda model, ...

This figure was constructed using look-up tables based on data from the G1 turbine models. For clarity, this has been added to the caption: *Values of  $C_T$  for different types of input signals, created using a look-up table for the G1 turbine model. The thrust coefficient is shown for three different sinusoidal excitations: on  $C_T$ , on  $C_T'$  and on the collective pitch angle  $\beta$ , tuned such that the amplitude of  $C_T'$  is 1.5. The dashed line shows the steady-state optimal  $C_T$ .*

- 5. page 4: A region I-1/2 with constant rotor speed equal to 6 rpm extends from the cut-in speed of 4 m/s to 7 m/s. I'm a bit surprised by this please double check. As far as I remember, in region 1.5 the rotor speed is increasing, and not constant.

XXX

- 6. Table 2: for completeness, please add values for average pitch angle and amplitude of pitch oscillation

As suggested by the referee, mean values of the average and amplitude of the pitch angle are added to Table 2.

- 7. Following up on previous point, for sake of reproducibility, it would make sense to add a detailed figure with the  $C_T$  &  $C_T'$  signal together with the pitch signal and the rotational speed signal

As requested by the referee, such a figure has been added to Section 6. The figure shows the requested variables for the optimal low-TI case:  $St = 0.31$ ,  $A = 1$ . The  $C_T$  and  $C_T'$  measurements are displayed, both filtered and unfiltered, as well as the best sinusoidal fit to this data. Furthermore, the pitch excitation and the rotor speed is given, with the latter also compared to the baseline case.

- 8. page 7, line 15: Once the optimal DIC parameters in terms of wake mixing have been evaluated using CFD, ... not sure CFD is used... - cf point 3 above? How did you determine optimal DIC parameters?

As explained in point 3, the CFD simulations were removed from the paper. The parameters chosen here are close to the optimum found in the wind tunnel.

- 9. page 8, line 9: please refer again to Turbsim, and IEC when you reference to NTM

The references suggested by the referee have been added here.

- 10. Figure 8, check caption

The erratum in the caption has been removed.

- 11. page 11, start of section 6.1: five different cases are mentioned, but later on, results of only three experiments seem to be reported (the ones with different amplitudes). What about results for block signal, and results for phase difference between turbines?

The results of these last two experiments have been cut from the paper, since the results were as of yet inconclusive. However, the authors have overlooked this reference to these experiments, which was therefore not removed. This has been done now.

- 12. Figure 9: I'm a bit confused: in the caption you mention different amplitudes, but in the legend (bottom-left panel) you seem to show averaged values for  $C_T$  (1, 1.5, 2). First of all are these averaged values of  $C_T$  (see table 2)? Therefore, do you mean different average & amplitude. Please clarify and improve caption/legend

This figure shows, as mentioned in the caption, results for different amplitudes of excitation of  $C_T'$ . To remove any ambiguity, the legend has been changed to read Amplitude  $A$  instead of  $C_T$ . Furthermore, a reference to Table 2 is added, where the corresponding mean and amplitude of  $C_T$  and pitch angle  $\beta$  can be found.

- 13. page 15, line 4: It can therefore be concluded .... In the work of Munters, Sinusoidal DIC was shown to work for the first turbine, with a positive effect on the second, but not on the third. Sinusoidal DIC applied to the second (or later) turbines did not work. The results in the current paper seem to confirm this. Therefore, this conclusion should probably be adapted/tuned down a bit + maybe additional discussion on future work in the conclusions section.

This comment is very similar to the first comment of Referee #1. For a more detailed response, the reader is therefore referred to the response given here. In short, the wind tunnel experiments show that the largest positive effect is measured at turbine 2, but there is also a (very small) positive effect at turbine 3. A more elaborate discussion on these results has been added to both Section 6.2 (results) and 7 (conclusions).

- 14. Continuing on the previous point: what about the results of the out-of-phase experiment with the first & second turbine (cf. comment 11 above) was this intended to improve turbine 3 performance if so, what were the results. Did you do in-phase as well? Reading the text, I'm presuming that most experiments were only using sinusoidal DIC on the first turbine? Is that correct? Should maybe be emphasized/discussed a bit more throughout.

First of all: yes, it is correct that in the results presented in this paper, periodic DIC was only applied on the first (upstream) turbine. To emphasize this, a mention of this is added once more both in Section 2 (Control Strategy) and Section 6 (Results).

Secondly, regarding the experiments with periodic DIC on both turbines 1 and 2: as mentioned at the response to comment 11, these results were inconclusive. Based on the experiments, it could not be said whether this strategy would positively effect the power capture of the wind farm, nor what the influence of a phase offset was. Therefore, the choice was made not to include these results in this paper. This is possible future research direction though, and as such has been added to the conclusions.

- 15. page 15, line 15: to be fair, you should compare weighted DEL against weighted power gain (which will also be much lower when averaged over a Weibull distribution)

The referee is absolutely right that the power gain weighted over a Weibull distribution would be significantly lower, as periodic DIC will only be effective when there is full wake interaction between turbines. However, this paper does not investigate the potential AEP of a wind farm. Rather, it shows that - when wake interaction is present - periodic DIC can be an effective method to increase power production, with the load effects being relatively small. As already mentioned in the conclusions, a future research challenge lies in further investigating the turbine loads with respect to the potential power gain.

- 16. page 16, line 1: significant differences between simulations and experiments. What do you mean by that? please clarify...

There are some differences between the results found in simulations executed by Munters and Meyers, and the wind tunnel results presented in this paper. Most notably, the optimal frequency and amplitude of excitation is found to be slightly higher and lower respectively. To name these differences "significant" might be a bit too definite, so this was changed to "some minor differences". Furthermore, the aforementioned differences are now explicitly named in a prior paragraph of the conclusions.



## Response to comments of Anonymous Referee #3

- The paper is well structured and makes a relevant contribution with first scaled wind tunnel experiments of dynamic induction farm control, as well as load evaluation by aeroelastic simulation for excited upstream wind turbine. Sound methodology is applied to results analysis. Publication is recommended upon addressing some minor comments listed below, added to those of the other referees.

The authors would like to thank the referee for his constructive feedback in improving the quality of the paper.

- Page 8, Line 1: Which was the reason behind the choice of a pitch amplitude of 2 degrees? Could you please better specify? Has this pitch amplitude any relation to the amplitude used in the scaled tests?

The pitch amplitude of 2 degrees leads, for the NREL 5MW turbine, to an excitation amplitude of  $C_T'$  of approximately  $A = 1.5$ . This case can therefore be considered an "average" load case. This clarification is now added to Table 1, where the different cases are defined.

- Besides, the experiments have shown greater dependency on the amplitude than on the frequency (Strouhal number). Wouldnt it be coherent to perform in future work the load simulations also in accordance to this by varying the pitch amplitude in order to see the effect on loading of changing such amplitude?

The authors agree that this would be a very interesting future research direction. The analysis presented in this paper should really be seen as a first step in evaluating the load effects of DIC. Such an investigation would indeed be very interesting to perform. Further investigation into these loads has been added more explicitly to the future research possibilities in Section 7.

- Section 7- Conclusions could be further elaborated by gathering nice comments previously included in the paper and by precisising better some aspects: It is shown that by acting on turbine 1, turbine 3 remains unaffected.

The observation that "most of the gain [is] coming from the first downstream turbine" has been added to the conclusions.

- It is shown that, for a given mean wind speed, the change in the power gain mostly depends on the amplitude of the DIC and not on the frequency. Would it be any dependence on the mean wind speed? The experiments have examined the effect of DIC under different TI conditions. It would also be interesting to see in the future the effect under different mean wind speed conditions.

The authors absolutely agree with the referee that investigating the effect of different mean wind speed conditions would be very interesting. It would for example be very informative to check whether DIC would also work with above-rated wind speeds, when the pitch angle is already varied to ensure constant power output. Therefore, this suggestion has been added to the future research opportunities in Section 7.

- Page 15, Line 17 to Page 16, Line 1: In all, it can be concluded that the dynamic induction control approach shows great promise, as now both simulations and scaled experiments show that it is possible to achieve a power gain. However, significant differences are found between simulation and experiments, which still need to be addressed. The conclusion included does not apply to the presented simulation results, which consist in the simulation of one single turbine, mainly for loading evaluation. These simulations don't provide insights into the behavior and power gain at farm level. Equally, it is not clear which are the significant differences between simulation and experiments this statement makes reference to.

This comment is similar to comment 16 of Prof. Meyers, so the response is also similar. This comment refers to differences between the results found in simulations executed by Munters and Meyers, and the wind tunnel results presented in this paper. This is now clarified more explicitly. Most notably, the optimal frequency and amplitude of excitation is found to be slightly higher and lower respectively. To name these differences "significant" might be a bit too definite, so this was changed to "some minor differences". Furthermore, the aforementioned differences are now explicitly named in a prior paragraph of the conclusions.

- Is there any hypothesis on why the increase in the DIC amplitude provokes such decrease in the final power gain?

As already discussed in Section 6, the power loss is caused by a very significant drop in power production of the excited turbine with higher DIC amplitudes, for which downstream machines cannot fully compensate. A possible explanation for this could be a slight rotor imbalance which was present in the *G1* models, which causes significant vibrations on the excited turbine for higher amplitudes of excitation. This explanation has been added to both Section 6 (results) and Section 7 (Conclusions).

- For practical application of the technology, taking into account that DIC is intended for region II -among others-, have you considered the possible risk of stall when applying a periodic pitch variation of several degrees around fine pitch? The value of 2 degrees used in simulations (section 5) could prove to be relevant.

Stall is not something we have looked into as of yet, although we are of course aware of this risk. However, this did not prove to be a problem in the scaled experiments, as quite extreme pitch variations (up to  $\pm 5^\circ$ ) were used without stall issues. Investigating the risk of stall on full scale machines, although of course very interesting, is out of the scope of this research.

- The lowest tested amplitude for DIC has proved to be the best one. So, one question that arises is whether further decrease in the amplitude would lead to even better results. It would be interesting to determine in the future which is the minimum "A" that provides the maximum power gain.

The authors fully agree with this observation. For this reason, it is also clearly mentioned in the conclusions that further experiments are necessary to determine the full possibilities of periodic DIC.

- In the wind tunnel experiments it has been possible to measure the thrust coefficient thanks to the knowledge about the wind conditions. This has allowed the determination by trial and error of the pitch variation in order to provide a thrust coefficient (amplitude, frequency) matching the desired one. How would this technology be applicable in real wind turbines where such detail of information about wind conditions is not so easily and precisely available?

In the experiments presented here, a excitation of the collective pitch was used to create a certain desired thrust coefficient. Assuming the optimal settings are independent of the wind speed (which is yet to be investigated), the optimal pitch excitation could simply be used without knowledge on the wind conditions. However, a far more interesting solution, which is also mentioned in the future research opportunities, is to develop a closed-loop dynamic induction control algorithm, including an engineering model or observer to estimate the wind conditions. This controller would then determine the optimal DIC settings and would be able to adapt to changing wind conditions based on the latest measurements of, for example, the turbine power production.

- For the sake of clarity and reproducibility: It would be advisable to indicate upfront from the very beginning of the paper that it focuses on below rated conditions and excitation of collective pitch angle. Also, to leave an explanatory comment about induction as in-wake speed deficit.

Both the below-rated testing conditions and the induction definition have been included in the introduction.

- Table 1: Missing frequency units in last row (Frequency of excitation in St). Its understood that it is Hz, but better to leave it explicit.

As mentioned in the text, the Strouhal number  $St$  is actually dimensionless. For clarity, "[-]" was added after  $St$  to note this dimensionlessness.

- Table 2: Please make coherent the denomination for the amplitude variable A (third column in the table) with the description in the table caption (CT,DIC).

Due to a different comment from another referee, the caption of Table 2 has been modified. The denominations are now all coherent.

- Page 7, Line 18: It could be added as examined load the hub torsional moment, taking into account that these results are presented in Table 3.

The mention of the hub torsional moment has been added here.

- Page 8, Line 9: It could be added mean therefore indicating mean hub wind speed of

The addition of the word "mean" has been implemented as requested.

- Figure 7 and Figure 8, caption: It could be added mean therefore indicating mean wind speed

The addition of the word "mean" has been implemented as requested.

- Table 3. The table caption would be clearer if it is indicated that the percentages refer to improvement with respect to baseline. Equally, it is indicated AEP in the caption, although the values are not included in the table. The percentage of variation of power with respect to baseline is of great interest, in order to compare the order of magnitude with the results of turbine 1 in the wind tunnel experiments. So, it would be advisable to introduce such information, not only in terms of AEP, but also through a figure of comparison with baseline, for example power time plot corresponding to Figure 5.

The caption has been augmented to include that the results are given with respect to the baseline. AEP values of the excited turbine have been included. To accommodate the desire of the referee, a figure of the AEP over time has also been added to the paper.

- Section 6. It would be advisable to indicate the layout of the wind farm tested in the wind tunnel, either through written explanation or through a descriptive figure.

The authors completely agree that such a figure was missing from the paper. In Section 4, explaining the wind tunnel setup, the requested figure showing the layout of the wind farm in the wind tunnel has been added.

- Table 4, caption: Caption could be clearer by making reference to baseline: An overview of the total power increase with respect to baseline by applying

As requested, the text "with respect to the baseline case" has been added in the caption of Table 4.

- Table 4 and Table 5: It would be advisable to indicate the frequency units (first row).

The requested frequency units have been added as requested.

- Page 11, Line 5: When mentioning the change of +2% in blade root loads, it would be advisable to specify flapwise. Equally, when mentioning the negligible impact found in edge-wise and in the hub, it would be clearer to mention the respective percentages, since for edgewise, its only 0.4%, but for the hub it accounts for 1% to 2%.

All suggested additions have been implemented.

- The discussion of load results is mainly done for  $St = 0.4$  and  $St = 0.5$ , while the best fit for experiments is provided by  $St = 0.33$  (low TI) and  $St = 0.29$ . Which would be the correspondence between the  $St$  results in the scaled tests and those for a full-scale model such as the one simulated in CP-LAMBDA?

It is hard to say how the optimal Strouhal number scales with the turbine size. The full-sized turbines used by Munters and Meyers find an optimum of  $St = 0.25$ , and the Strouhal number does scale for rotor size, so it could be argued that the optimal Strouhal number is (relatively) independent on the rotor size. This is something that could still be investigated in the future. The analysis done here focusses on the possible load effects for different Strouhal numbers, without arguing which of these would be optimal for power production in this case. The discussion of the results has been changed to include  $St = 0.3$ .

- Page 11, Line 18: When making reference to the experiments with different amplitudes on a sinusoidal input, it would be convenient to introduce the reference to Table 2. Equally, it could be helpful to indicate again that the sinusoidal input is applied to the collective pitch, which is the range of variation of the pitch angle, and which correspondence this would have with the pitch angle in a full-scale wind turbine.

The requested reference to Table 2 has been added. The authors feel that this reference suffices as all the information requested by the referee can be found in this table. By focussing on the amplitude of the  $C_T$ -excitation, the authors also feel that a notion on scalability of the pitch amplitude is unnecessary: this might differ per turbine, but can easily be calculated with the required  $C_T$ - $\beta$ -tables.

- Page 13, Line 3. In the same way that it is indicated explicitly for low TI experiments (Page 11, Line 17), it would be nice to indicate the approximate value of TI applied in the high TI experiments.

As requested, the high-TI value (10%) has been added here.

- Page 13, Line 6. For higher clarity, it could be indicated to which production it makes reference the sentence. It is understood that it refers to: the baseline power production of this turbine is already slightly lower than in low TI conditions.

The referee is correct in his assumption. For clarity, the suggested addition has been made.

- Page 14, Line 8: For the sake of clarity, it would be advisable to introduce again the reference Schreiber et al. (2017), which was already indicated in Page 4.

The requested reference has been added here.

- Page 3, line 8: were instead of where

This erratum has been corrected.

- Table 1 The frequencies of excitation in  $St$  indicated for the aeroelastic simulations Between 0.3 and 0.5 dont match the range of frequencies of DIC stated in Section 5, Page 8, where it is stated that this frequency varies from 0.00952 Hz to 0.0595 Hz. Equally, the frequencies indicated for the experiments [0.09-0.41] dont match the frequencies included in Table 4 and Table 5 [0.5-2.3].

The referee seems to confuse two different units here. In general, the frequency of excitation is expressed with the dimensionless Strouhal number, as defined in Section 2. This unit is also used in Table 1, so the values given here are dimensionless, not in Hertz. They do in fact match with the values of  $St$  given in Tables 4 and 5, as well as the values of  $St$  mentioned on page 8.

To prevent such confusion in a future version of the manuscript, the word "frequency" has been removed from Table 1, which now reads "Strouhal number  $St$  of excitation [-]". Table 4 and 5 already contained both the frequency in Hertz as well as the Strouhal number, but units have been added to clarify the difference. Hopefully this removes the confusion and helps the referee understand the implemented control signals.

- Page 6, line 15: kHz instead of kH

This erratum has been corrected.

- Figure 5, xlabel: It would be preferable to indicate time units in accordance to the symbol stated by the International System of Units: s

The units have been changes from "sec" to "s".

- Figure 7 and Figure 8, xlabel: It could be introduced a space between Wind Speed and the unit [m/s]

A space has been added before the unit.

- Page 11, Line 1: According to SI unit rules and style conventions, unit should not be italic m/s.

The unit is no longer displayed in italic.

- Page 11, Line 3: In accordance to style convention, there should be a space between the number and unit 15 m/s

A space has been added.

- Page 11, Line 22: It seems that the verb is missing in the sentence: the power is divided

This is corrected as suggested by the referee.

- Figure 9, Caption: The reference in the figure legend and caption should be coherent between CT and CT.

As a response to a different comment, the legend and caption of this figure has already been changed. The amplitude is now given by the variable  $A$  in both the legend and caption.

- Figure 11, legend: It seems that baseline would fit better than "benchmark", also keeping coherence with previous figures such as Figure 9.

This has been corrected.

- Page 14, Line 2: It seems that the sentence However, since the power gain at turbine 3 is slightly lower, the total power is also lower than in the baseline case would indeed make reference to turbine 2, according to the figures.

The referee is right in his assumption, and this has been corrected.

- Page 15, Line 15: To be corrected weighted instead of weighed.

This has been corrected.

- It would be preferable to specify the increase of the weighted DEL with respect to baseline. Equally, the values of DEL included could be misleading without specifying which load they make reference to. Indeed, the 0.3-0.4% refers to blade root edgewise, which is the least affected by DIC.

The addition "with respect to the baseline case" has been added, as well as the notion that these number refer to the blade root edgewise loads.

## Response to comments of Anonymous Referee #4

- Dear authors, Thank you very much for submitting the paper to the WES journal. It was nice reading the paper and it is of high quality. Altogether a lot of relevant work is presented and it gives a significant contribution to the community. The paper follows a clear structure and gives a lot of background information that helps to understand the tasks that have been performed. Altogether I recommend the publication with the consideration of the following minor corrections and the comments of the other reviews.

The authors would like to thank the referee for the compliments, as well as for the constructive feedback in improving the quality of the paper.

- Abstract: Please introduce the idea of induction control before naming it and extend the abstract a little more. This would help people being not familiar with the topic to understand the content of the paper.

The abstract has extended: it now includes a (very general) introduction into wind farm control as well as in induction control. The additions made are as follows: *As wind turbines in a wind farm interact with each other, a control problem arises that has been extensively studied in literature: how can we optimize the power production of a wind farm as a whole. A traditional approach to this problem is called induction control, in which the induction factor, i.e. the in-wake wind speed deficit, of a turbine is lowered such that downstream turbines can increase their power capture.*

- Figure 1: Please explain the figure in more detail in the caption. This figure basically presents the whole concept and needs therefore more explanation.

A much more elaborate caption has been added to this figure, to better explain the concepts shown here.

- p. 2 l.4: you say DTU 5 MW turbine: NREL 5 MW turbine

This erratum has been corrected.

- Table 1: Munters et. al.

This erratum has been corrected.

- Table 1: please first introduce beta and  $c_T$  before having the table. I know that latex is placing it like this, but moving it to the next page is preferable.

The paragraph introducing these variables is moved forward, such that it precedes the table, as well as the first mention of the table.



- Page 4: yaw control: to me wake steering is more familiar than yaw control. Maybe you need to add both or replace it

Both "yaw control" and "wake redirection control" are now explicitly mentioned here.

- Figure 7-12: the style of the labels differ to the previous plots,

The difference in style has been removed: all labels are now in "normal" letter style.

- Figure 7, 8: a space before unit (As mentioned in caption Fig. 8)

The space before the units has been added.

- Conclusions: p.16 l.1: please again name the differences in the conclusions

The differences, namely a slightly different optimal Strouhal number  $St$  and amplitude  $A$ , are now explicitly mentioned again in the conclusions.

- Acknowledgements: program: programme

This erratum has been corrected.
